# Supplementary material
Source: publisher site journal article supplement (https://www.spandidos-publications.com/8441/downloadSupplementary)
Supplement: Supplementary file 1 [file downloadSupplementary]

Table SIV. The significant results of univariate Cox analysis for immune-related genes in The Cancer Genome Atlas-colon adenocarcinoma dataset.

| ID     | Hazard Ratio | HR.95L   | HR.95H   | P-value  |
|--------|--------------|----------|----------|----------|
| CGB2   | 2.931158     | 1.627774 | 5.278183 | 0.000339 |
| PTPN6  | 2.438062     | 1.494645 | 3.976962 | 0.000357 |
| S100Z  | 52.28512     | 5.668783 | 482.2436 | 0.000482 |
| UCN    | 1.437757     | 1.170998 | 1.765286 | 0.000525 |
| HSPA1A | 1.266135     | 1.105914 | 1.449567 | 0.00063  |
| INSL3  | 2.129085     | 1.377235 | 3.291378 | 0.000674 |
| PTH1R  | 2.184785     | 1.365464 | 3.495725 | 0.001119 |
| NTF4   | 2.024441     | 1.324595 | 3.094048 | 0.001119 |
| LHB    | 1.459555     | 1.161852 | 1.833538 | 0.001159 |
| CRLF1  | 2.496746     | 1.436333 | 4.340039 | 0.00118  |
| SEMA4C | 1.503977     | 1.166097 | 1.939759 | 0.001669 |
| TRAJ52 | 1.310899     | 1.1039   | 1.556712 | 0.00202  |
| IRF7   | 1.443287     | 1.141648 | 1.824622 | 0.002159 |
| IFI30  | 1.762026     | 1.226451 | 2.531477 | 0.002183 |
| LTB4R  | 1.328694     | 1.107781 | 1.593661 | 0.002189 |

|         |          |          |          |          |
|---------|----------|----------|----------|----------|
| CRHR1   | 5.57E+19 | 6841820  | 4.54E+32 | 0.002721 |
| CD1A    | 0.674375 | 0.520672 | 0.873452 | 0.002834 |
| NR2E1   | 40.72849 | 3.308884 | 501.32   | 0.003801 |
| NGF     | 9.957474 | 2.084627 | 47.56309 | 0.003968 |
| NFATC1  | 1.881766 | 1.221052 | 2.899993 | 0.00417  |
| RBP7    | 1.533859 | 1.142656 | 2.058995 | 0.004404 |
| ROBO3   | 1.442921 | 1.120789 | 1.85764  | 0.004446 |
| RN7SL1  | 0.841673 | 0.746799 | 0.948599 | 0.004732 |
| PLXNA3  | 1.458778 | 1.119903 | 1.900194 | 0.005117 |
| HAMP    | 1.412947 | 1.106208 | 1.80474  | 0.005635 |
| SEMA6C  | 1.46276  | 1.117112 | 1.915357 | 0.00569  |
| CD1B    | 0.602122 | 0.419241 | 0.864779 | 0.006023 |
| ANGPTL4 | 1.26456  | 1.068682 | 1.496339 | 0.006265 |
| LMBR1L  | 2.01558  | 1.212932 | 3.349373 | 0.006832 |
| C8G     | 1.218214 | 1.055204 | 1.406406 | 0.007079 |
| VEGFD   | 4.918923 | 1.533538 | 15.77776 | 0.007384 |
| FABP4   | 1.146644 | 1.037203 | 1.267633 | 0.007503 |
| CSH2    | 2.590225 | 1.285992 | 5.217192 | 0.007721 |

|          |          |          |          |          |
|----------|----------|----------|----------|----------|
| CD72     | 1.802334 | 1.16727  | 2.782909 | 0.007866 |
| INHBB    | 1.165833 | 1.037319 | 1.310269 | 0.01003  |
| TGFB2    | 1.79826  | 1.147772 | 2.817405 | 0.010419 |
| TNFRSF19 | 1.394078 | 1.080781 | 1.798194 | 0.010524 |
| GCGR     | 1.955731 | 1.169259 | 3.271203 | 0.010595 |
| BACH2    | 10.08875 | 1.713057 | 59.41592 | 0.01062  |
| HSPA1L   | 1.663168 | 1.121603 | 2.466226 | 0.011377 |
| IFNL1    | 1.813686 | 1.141215 | 2.882417 | 0.011775 |
| SHC2     | 1.308511 | 1.059828 | 1.615546 | 0.01241  |
| XCL1     | 1.424674 | 1.079064 | 1.880978 | 0.012534 |
| IL7      | 0.41735  | 0.207643 | 0.83885  | 0.014155 |
| IGHV3-35 | 0.852897 | 0.750949 | 0.968686 | 0.014294 |
| BCL10    | 0.733562 | 0.572107 | 0.940581 | 0.014568 |
| NR1H2    | 1.794042 | 1.121273 | 2.870476 | 0.014798 |
| LCN1     | 1.770837 | 1.115614 | 2.810886 | 0.015348 |
| RARA     | 1.359568 | 1.060516 | 1.742949 | 0.01537  |
| TRDD2    | 1.649512 | 1.100413 | 2.472607 | 0.015382 |
| CX3CL1   | 1.230148 | 1.039506 | 1.455753 | 0.015911 |

|         |          |          |          |          |
|---------|----------|----------|----------|----------|
| AMH     | 1.14891  | 1.026204 | 1.286288 | 0.016004 |
| VAV2    | 1.431275 | 1.068177 | 1.917797 | 0.016318 |
| ANGPT4  | 98.26197 | 2.283518 | 4228.307 | 0.016841 |
| CCL22   | 0.80453  | 0.673001 | 0.961764 | 0.01694  |
| NFATC4  | 1.340455 | 1.053735 | 1.705191 | 0.017023 |
| TPM2    | 1.198376 | 1.031839 | 1.391792 | 0.017763 |
| LEP     | 1.42525  | 1.062659 | 1.911562 | 0.017996 |
| LCN8    | 1.413437 | 1.060085 | 1.884569 | 0.018398 |
| RORC    | 0.806248 | 0.673821 | 0.964702 | 0.018647 |
| PROK1   | 1.98352  | 1.113322 | 3.533886 | 0.020111 |
| AVPR2   | 1.260362 | 1.036356 | 1.532786 | 0.020469 |
| GRP     | 1.289886 | 1.039863 | 1.600024 | 0.020584 |
| UTS2    | 1.293078 | 1.039489 | 1.608533 | 0.021016 |
| FABP9   | 2.672353 | 1.155844 | 6.178575 | 0.021525 |
| CLEC11A | 1.276618 | 1.036548 | 1.57229  | 0.02158  |
| NOS2    | 0.860635 | 0.755746 | 0.980081 | 0.023612 |
| IL13    | 0.393956 | 0.175831 | 0.882673 | 0.023625 |
| MCHR1   | 1.351836 | 1.041056 | 1.755393 | 0.023707 |

|          |          |          |          |          |
|----------|----------|----------|----------|----------|
| SPAG11B  | 74.41128 | 1.751992 | 3160.425 | 0.024251 |
| IL1RL2   | 1.532743 | 1.056425 | 2.223822 | 0.02451  |
| SCT      | 1.153688 | 1.018127 | 1.307298 | 0.024984 |
| IL11RA   | 1.382669 | 1.039827 | 1.838549 | 0.025842 |
| PLCG2    | 1.693249 | 1.064718 | 2.692817 | 0.026089 |
| BDNF     | 2.985779 | 1.138323 | 7.83159  | 0.026196 |
| JAG2     | 1.273074 | 1.026741 | 1.578507 | 0.027773 |
| HSPA1B   | 1.253269 | 1.024529 | 1.533078 | 0.028117 |
| PLXNB3   | 1.221679 | 1.020888 | 1.461963 | 0.028843 |
| LTBP3    | 1.234867 | 1.020206 | 1.494696 | 0.030366 |
| TNFRSF25 | 1.257162 | 1.021553 | 1.547111 | 0.030668 |
| UTS2B    | 2.080814 | 1.067519 | 4.055932 | 0.03141  |
| QRFP     | 1.402559 | 1.02995  | 1.909968 | 0.031771 |
| CXCL1    | 0.860317 | 0.74989  | 0.987007 | 0.031829 |
| TRBV6-8  | 1.506489 | 1.03545  | 2.191807 | 0.032188 |
| EPOR     | 1.328918 | 1.024185 | 1.724321 | 0.032372 |
| VEGFC    | 1.86674  | 1.053259 | 3.308508 | 0.032544 |
| FLT4     | 1.371111 | 1.026306 | 1.831759 | 0.032707 |

|           |          |          |          |          |
|-----------|----------|----------|----------|----------|
| SLC11A1   | 1.189606 | 1.01431  | 1.395197 | 0.032789 |
| SEMA4D    | 1.69335  | 1.043249 | 2.748561 | 0.033065 |
| FABP7     | 1.471482 | 1.030579 | 2.101013 | 0.033526 |
| EPO       | 1.877684 | 1.050234 | 3.357061 | 0.033562 |
| TXK       | 2.656488 | 1.077218 | 6.55107  | 0.033882 |
| GAST      | 1.46036  | 1.028643 | 2.073267 | 0.034183 |
| IGF1      | 2.518837 | 1.070808 | 5.924999 | 0.034283 |
| MAP3K14   | 1.410818 | 1.023108 | 1.945451 | 0.035789 |
| ULBP2     | 1.196714 | 1.011493 | 1.415851 | 0.036334 |
| DAXX      | 1.602002 | 1.029508 | 2.492852 | 0.03672  |
| CTF1      | 1.237874 | 1.013128 | 1.512478 | 0.036838 |
| IGLV1-50  | 0.86288  | 0.750893 | 0.991569 | 0.037587 |
| LTB4R2    | 1.33864  | 1.016656 | 1.7626   | 0.037743 |
| ADIPOQ    | 1.191493 | 1.009634 | 1.40611  | 0.038132 |
| PDIA2     | 1.160914 | 1.007641 | 1.337503 | 0.038892 |
| NR1D1     | 1.291738 | 1.012725 | 1.647621 | 0.039226 |
| ACTG1     | 0.667371 | 0.453874 | 0.981294 | 0.039786 |
| IGKV2D-29 | 0.913335 | 0.837485 | 0.996055 | 0.04043  |

|          |          |          |          |          |
|----------|----------|----------|----------|----------|
| NGFR     | 1.218668 | 1.008453 | 1.472703 | 0.040648 |
| SEMA5B   | 3.339125 | 1.048344 | 10.63559 | 0.041366 |
| LRSAM1   | 1.599423 | 1.018166 | 2.512511 | 0.041541 |
| S100A5   | 1.317857 | 1.01055  | 1.718617 | 0.041607 |
| CRH      | 1.886819 | 1.022893 | 3.48041  | 0.042111 |
| NMB      | 1.348119 | 1.010621 | 1.798326 | 0.042171 |
| PAK6     | 1.415398 | 1.011437 | 1.980696 | 0.042735 |
| APOD     | 1.135396 | 1.003266 | 1.284928 | 0.04426  |
| IGLV7-43 | 0.92312  | 0.853818 | 0.998047 | 0.04453  |
| OXTR     | 1.313206 | 1.006627 | 1.713157 | 0.044573 |
| SEMA3E   | 3.374843 | 1.029779 | 11.06021 | 0.044599 |
| FLT1     | 1.405076 | 1.008141 | 1.958296 | 0.044661 |
| TYK2     | 1.507897 | 1.009083 | 2.253289 | 0.045061 |
| CCRL2    | 0.762186 | 0.584189 | 0.994418 | 0.045369 |
| IGKV2-24 | 0.919568 | 0.847018 | 0.998332 | 0.045523 |
| MANF     | 0.711395 | 0.509432 | 0.993426 | 0.045643 |
| GPHA2    | 1.385328 | 1.005958 | 1.907767 | 0.045896 |
| NOX5     | 3.128511 | 1.020832 | 9.587852 | 0.045929 |

|           |          |          |          |          |
|-----------|----------|----------|----------|----------|
| CXCR5     | 3.596762 | 1.021415 | 12.66546 | 0.046266 |
| DEFB104B  | 2.29E+11 | 1.496259 | 3.51E+22 | 0.046522 |
| CXCL3     | 0.86257  | 0.745586 | 0.99791  | 0.0468   |
| DUOX1     | 1.326026 | 1.003915 | 1.751487 | 0.046869 |
| CCL28     | 0.836309 | 0.7011   | 0.997593 | 0.04695  |
| FAS       | 0.722344 | 0.523655 | 0.996423 | 0.047502 |
| BST2      | 1.130824 | 1.000996 | 1.277491 | 0.04816  |
| TNFRSF11A | 0.807329 | 0.652615 | 0.99872  | 0.048637 |
| DHX58     | 1.33482  | 1.001668 | 1.778776 | 0.048685 |
| IGKV6-21  | 0.908755 | 0.826117 | 0.999659 | 0.049185 |
| VEGFA     | 1.302478 | 1.00007  | 1.696329 | 0.049939 |

HR.95L, lower limit of the 95% confidence interval; HR.95H, upper limit of the 95% confidence interval.

Table SV. Significant results of univariate Cox analysis for programmed cell death-related genes in The Cancer Genome Atlas-colon adenocarcinoma dataset.

| ID     | Hazard Ratio | HR.95L   | HR.95H   | P-value  |
|--------|--------------|----------|----------|----------|
| ATP2A1 | 2.017898     | 1.408795 | 2.890353 | 0.000128 |
| NOG    | 1.607583     | 1.256109 | 2.057404 | 0.000162 |
| POU4F2 | 4.883139     | 2.120984 | 11.24245 | 0.000194 |
| NOL3   | 1.818154     | 1.326937 | 2.491213 | 0.000199 |
| TERT   | 2.017393     | 1.382175 | 2.944544 | 0.000275 |
| MIR210 | 1.234663     | 1.097791 | 1.388601 | 0.000438 |
| POU4F1 | 1.478306     | 1.182735 | 1.847741 | 0.000593 |
| HSPA1A | 1.266135     | 1.105914 | 1.449567 | 0.00063  |
| STK25  | 2.194921     | 1.38456  | 3.479574 | 0.000826 |
| ALOX12 | 2.189268     | 1.368297 | 3.502818 | 0.001085 |
| GPSM1  | 1.541347     | 1.188769 | 1.998496 | 0.001095 |
| CTSD   | 1.661081     | 1.212772 | 2.275109 | 0.001567 |
| FDFT1  | 0.65831      | 0.502696 | 0.862096 | 0.002379 |
| DAPK1  | 1.491437     | 1.14929  | 1.935443 | 0.002643 |
| GALNS  | 1.710297     | 1.194552 | 2.448712 | 0.003381 |

|          |          |          |          |          |
|----------|----------|----------|----------|----------|
| CDKN2A   | 1.274168 | 1.082925 | 1.499182 | 0.003499 |
| TRAF1    | 1.592039 | 1.163839 | 2.177783 | 0.003624 |
| IDUA     | 1.464726 | 1.130997 | 1.896929 | 0.003815 |
| SLC39A8  | 0.697992 | 0.546896 | 0.890833 | 0.003868 |
| NGF      | 9.957474 | 2.084627 | 47.56309 | 0.003968 |
| FASTK    | 1.83129  | 1.211494 | 2.768172 | 0.004104 |
| RRAGB    | 1.704576 | 1.180705 | 2.460883 | 0.004419 |
| EEF1A2   | 1.285519 | 1.080295 | 1.529729 | 0.00465  |
| TRAF2    | 1.952241 | 1.227691 | 3.104399 | 0.004702 |
| MID2     | 1.800475 | 1.197343 | 2.707421 | 0.004724 |
| FES      | 1.394134 | 1.099758 | 1.767307 | 0.006038 |
| PLA2G15  | 1.768913 | 1.171513 | 2.670949 | 0.00667  |
| TMEM150A | 1.647981 | 1.148495 | 2.364695 | 0.006699 |
| DLAT     | 0.641748 | 0.465012 | 0.885655 | 0.00696  |
| ASAH1    | 0.650294 | 0.47544  | 0.889456 | 0.007079 |
| ATP6V1C2 | 1.450558 | 1.103382 | 1.906973 | 0.007703 |
| PIDD1    | 1.51861  | 1.113559 | 2.070997 | 0.008303 |
| WIPI2    | 1.873531 | 1.162402 | 3.019712 | 0.009941 |

|          |          |          |          |          |
|----------|----------|----------|----------|----------|
| MAP1LC3C | 2.008499 | 1.181364 | 3.414754 | 0.01001  |
| INHBB    | 1.165833 | 1.037319 | 1.310269 | 0.01003  |
| TRADD    | 1.668738 | 1.129179 | 2.466117 | 0.010181 |
| TMC8     | 1.308966 | 1.065432 | 1.608167 | 0.010365 |
| TGFB2    | 1.79826  | 1.147772 | 2.817405 | 0.010419 |
| HSPB1    | 1.295949 | 1.062199 | 1.58114  | 0.010632 |
| ING5     | 1.645734 | 1.118041 | 2.422487 | 0.011549 |
| BOK      | 1.408705 | 1.079586 | 1.838159 | 0.011602 |
| CTNNA1   | 0.608489 | 0.413218 | 0.89604  | 0.011873 |
| ZNF385A  | 1.280991 | 1.053632 | 1.557412 | 0.012991 |
| RBCK1    | 1.481519 | 1.082299 | 2.027995 | 0.014141 |
| BCL10    | 0.733562 | 0.572107 | 0.940581 | 0.014568 |
| TRIM8    | 1.59693  | 1.093359 | 2.332432 | 0.015446 |
| MAPK15   | 1.184836 | 1.032547 | 1.359587 | 0.015681 |
| CX3CL1   | 1.230148 | 1.039506 | 1.455753 | 0.015911 |
| ATP6AP1  | 1.644025 | 1.096765 | 2.464355 | 0.016076 |
| SIAH2    | 1.784907 | 1.111541 | 2.866195 | 0.016504 |
| SEPTIN4  | 1.509673 | 1.077816 | 2.114565 | 0.016582 |

|          |          |          |          |          |
|----------|----------|----------|----------|----------|
| NFATC4   | 1.340455 | 1.053735 | 1.705191 | 0.017023 |
| PCGF2    | 1.460947 | 1.070004 | 1.994727 | 0.017042 |
| WASHC1   | 1.682703 | 1.09651  | 2.582275 | 0.017237 |
| CD24     | 0.826255 | 0.705589 | 0.967556 | 0.017815 |
| LEP      | 1.42525  | 1.062659 | 1.911562 | 0.017996 |
| PLEKHF1  | 1.391432 | 1.05738  | 1.83102  | 0.01836  |
| SUPT5H   | 1.692209 | 1.08637  | 2.635907 | 0.020001 |
| BORCS6   | 1.523293 | 1.062724 | 2.183465 | 0.021955 |
| IL13     | 0.393956 | 0.175831 | 0.882673 | 0.023625 |
| FBH1     | 1.817785 | 1.080039 | 3.059465 | 0.02446  |
| ATG13    | 1.733339 | 1.073332 | 2.799195 | 0.02449  |
| SFRP2    | 1.095895 | 1.011393 | 1.187456 | 0.025308 |
| LZTS1    | 1.39792  | 1.042088 | 1.875254 | 0.025415 |
| ATP6V1G2 | 1.459282 | 1.046832 | 2.034235 | 0.025746 |
| BDNF     | 2.985779 | 1.138323 | 7.83159  | 0.026196 |
| MIR26B   | 1.20185  | 1.019778 | 1.416428 | 0.028262 |
| ZDHHC3   | 0.621312 | 0.406076 | 0.950632 | 0.028287 |
| VDAC3    | 0.702498 | 0.511756 | 0.964334 | 0.028914 |

|          |          |          |          |          |
|----------|----------|----------|----------|----------|
| TNFRSF25 | 1.257162 | 1.021553 | 1.547111 | 0.030668 |
| STXBP2   | 1.507081 | 1.036638 | 2.191018 | 0.031679 |
| EPO      | 1.877684 | 1.050234 | 3.357061 | 0.033562 |
| IGF1     | 2.518837 | 1.070808 | 5.924999 | 0.034283 |
| YBX3     | 1.614338 | 1.035293 | 2.517248 | 0.034602 |
| TRIM32   | 1.723371 | 1.039019 | 2.858473 | 0.035011 |
| HYAL1    | 0.854499 | 0.737705 | 0.989783 | 0.036001 |
| CRYAB    | 1.192925 | 1.011202 | 1.407307 | 0.036432 |
| DAXX     | 1.602002 | 1.029508 | 2.492852 | 0.03672  |
| GPR137   | 1.546307 | 1.026111 | 2.330222 | 0.037237 |
| ATP6V0A4 | 2.846027 | 1.061896 | 7.627743 | 0.037584 |
| PIP4K2B  | 1.469848 | 1.022205 | 2.11352  | 0.037665 |
| DEDD2    | 1.574782 | 1.024968 | 2.419528 | 0.038218 |
| DEF8     | 1.637511 | 1.023    | 2.621155 | 0.039908 |
| NGFR     | 1.218668 | 1.008453 | 1.472703 | 0.040648 |
| SLC39A14 | 0.743413 | 0.559582 | 0.987634 | 0.040774 |
| GATA2    | 1.254881 | 1.008882 | 1.560863 | 0.041411 |
| LRSAM1   | 1.599423 | 1.018166 | 2.512511 | 0.041541 |

|         |          |          |          |          |
|---------|----------|----------|----------|----------|
| CRH     | 1.886819 | 1.022893 | 3.48041  | 0.042111 |
| TBC1D25 | 1.581361 | 1.012093 | 2.470823 | 0.04414  |
| TYK2    | 1.507897 | 1.009083 | 2.253289 | 0.045061 |
| GATA1   | 0.288878 | 0.08566  | 0.974208 | 0.045275 |
| DDIT3   | 1.262394 | 1.0044   | 1.586656 | 0.04576  |
| PHKG2   | 1.46507  | 1.006102 | 2.133412 | 0.046405 |
| TPD52L1 | 1.430326 | 1.005292 | 2.035063 | 0.046668 |
| XBP1    | 0.745622 | 0.557885 | 0.996537 | 0.047322 |
| FAS     | 0.722344 | 0.523655 | 0.996423 | 0.047502 |
| ATG101  | 1.435472 | 1.002156 | 2.056147 | 0.048643 |
| TSC1    | 1.482885 | 1.002063 | 2.19442  | 0.048807 |
| PJVK    | 1.468745 | 1.001688 | 2.153576 | 0.048999 |
| MADD    | 1.498472 | 1.001359 | 2.242369 | 0.049233 |
| GPX4    | 1.402058 | 1.00073  | 1.964332 | 0.049506 |

HR.95L, Lower limit of the 95% confidence interval; HR.95H, Upper limit of the 95% confidence interval.
